# Country-Wide Agent-Based Epidemiological Modeling Using 17 Million Individual-Level Microdata

Ahmad Hesam<sup>1,2\*</sup>, Frank P Pijpers<sup>2,3</sup>, Lukas Breitwieser<sup>4</sup>, Peter Hofstee<sup>1</sup>, Zaid Al-Ars<sup>1</sup>

\*For correspondence:  
[a.s.hesam@tudelft.nl](mailto:a.s.hesam@tudelft.nl) (AH)

<sup>1</sup>Delft University of Technology, Delft, Netherlands; <sup>2</sup>Statistics Netherlands, The Hague, Netherlands; <sup>3</sup>Korteweg-de Vries Institute for Mathematics, University of Amsterdam, Amsterdam, Netherlands; <sup>4</sup>ETH Zurich, Zurich, Switzerland

---

**Abstract** Calibration is a crucial step in developing agent-based models. Agent-based models are notorious for being difficult to calibrate as they can express various degrees of freedom when model parameters are unknown. Models that appear correctly calibrated to match macro-level observed data perform poorly when micro-level insights need to be inferred. As a result, policymakers cannot be certain that an agent-based model can accurately describe the dynamics of the real-world phenomena that the model tries to mimic. To begin tackling this challenge, we developed a methodology for an epidemiological use case at a full population scale of 17 million agents to observe the effects of using microlevel data for the calibration on the accuracy of the microlevel model outcomes. We show that by calibrating a model on national statistics, but using individual-level microdata, we can on average get 36% more accurate model outcomes on a subnational level. Our model implementation performs two orders of magnitude faster than prior work and allows efficient calibration on HPC computer systems.

---

## Introduction

Agent-based modeling (ABM) has emerged as a powerful tool for exploring the behavior of complex social systems over time *Conte and Paolucci (2014)*. Agent-based models are designed to simulate the interactions between autonomous agents, allowing for a nuanced representation of emergent phenomena. In contrast to equation-based approaches, ABM allows us to program each agent to follow a set of rules that follow from a real-world system. Agents typically interact with a limited number of neighboring agents. In social systems, for example, agents are often connected through social networks (e.g. family, co-workers, friends).

Practical application of ABM to real-world use cases faces several challenges. One of the main difficulties in ABM is dealing with the extensive parameter space arising from the diverse free parameters attributed to each agent and their behaviors *Crooks et al. (2008)*. These parameters encompass a wide array of individual attributes and interactions, adding substantial complexity to the model. Moreover, obtaining datasets that provide precise, detailed information at the individual agent level (i.e. *microdata*) can be rather challenging. Even in cases where such a dataset is available, limitations in computational capacity often impede the simulation of each real-world actor as an individual agent in the model. The sheer amount of computational resources required to manage a large number of agents can be prohibitive, making it difficult to achieve the desired level of precision and fidelity in the model's representation of real-world dynamics. As a result,

41 many ABM studies let one simulated agent represent multiple real-world actors (e.g. one agent  
42 represents 100 persons) *Edmonds and Meyer (2017)*. Throughout this paper we will refer to the  
43 ratio between simulated agents and real-world actors is often referred to as the *ontological corre-*  
44 *spondence*. We found no studies that discuss and experimentally explore the effects of varying the  
45 ontological correspondence in agent-based modeling.

46 In this work, we analyze the effects of varying the ontological correspondence of ABMs on the  
47 simulated results, specifically highlighting the impact when simulated agents represent individual  
48 real-world actors. First, we investigate how high-quality social microdata affects the output results  
49 of agent-based simulation. We also show how the use of a state-of-the-art agent-based simulation  
50 platform (that can harness the computational power of modern hardware) enables us to scale up to  
51 high-resolution ABMs, as well as identify values for the diverse free parameters attributed to each  
52 agent. The platform BioDynaMo *Breitwieser et al. (2021)* focuses on supporting high-performance  
53 and modular agent-based simulations. BioDynaMo demonstrated unprecedented performance in  
54 biomedical applications, efficiently executing simulations of up to 1 billion agents on a single server  
55 *Breitwieser et al. (2023)*.

56 The relevant social microdata for epidemiological modeling, (e.g. age, sex, relationships, em-  
57 ployment status, etc.) are often sensitive data. The use of such data is understandably subject to  
58 rigorous regulations such as the EU GDPR (General Data Protection Regulation). For this reason in  
59 this paper, particular attention and extra emphasis is given to the secure supercomputing method  
60 we use to access such data in this study.

61 In this work we present the following contributions:

- 62 – We implement a country-wide epidemiological model for the Netherlands in BioDynaMo on  
63 a 1:1 agent-to-person resolution. At the time of the first wave of the COVID-19 epidemic in  
64 early 2020, the Netherlands had about 17.4 million inhabitants.
- 65 – We construct a method to simulate the model on a secure supercomputer platform to per-  
66 form parameter space exploration using high-quality sensitive microdata using a total of 1536  
67 CPU cores.
- 68 – We present an analysis of the effects of using various agent-to-person model resolutions and  
69 real-life microlevel data versus randomized synthetic data. We also present the results of a  
70 parameter sensitivity analysis for various resolutions.
- 71 – We describe a methodology behind distributing the calibration of agent-based models using  
72 the particle swarm optimization algorithm as part of a high-performance agent-based mod-  
73 eling framework.

## 74 Results

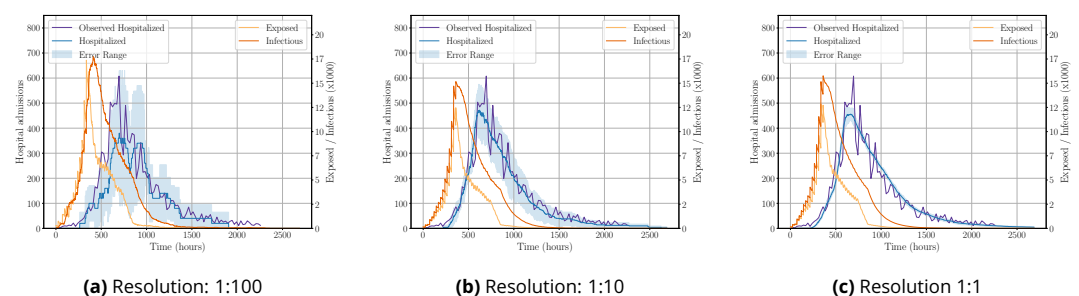

**Figure 1.** National hospital admissions in the Netherlands during the first wave of COVID-19 in 2020. Left y-axis: the daily hospital admissions from simulation (dark purple) and observed data (light purple). Right y-axis: the daily number of infections and exposed people (simulated data) in orange and yellow, respectively.

## 75 Hospital admission resolution effects

76 A key result of our study is the comparison between the observed hospital admissions during the  
77 initial COVID-19 wave in the Netherlands and its simulated counterpart. This comparison, detailed  
78 across various agent-to-person ratios, is shown in Figure 1. Across all examined ratios, there is  
79 a notable congruence between the simulated hospital admissions and the actual observed data,  
80 indicating the model's robustness in mirroring real-world outcomes. To quantify the accuracy im-  
81 provement, we calculate the percentage difference in the root mean squared error between the  
82 observed data and the mean simulated data for each resolution. We find an accuracy improve-  
83 ment of 49.3% when increasing the resolution from 1:100 to 1:10, and an improvement of 1.7%  
84 when increasing the resolution from 1:10 to 1:1.

85 However, it is important to highlight that the simulated results for the 1:100 agent-to-person ra-  
86 tio exhibit a relatively wide error margin. As we refine the agent-to-person ratio, leading to higher  
87 resolution simulations, we witness a strong reduction in this error margin, suggesting an improve-  
88 ment in the model's precision. Interestingly, the 1:100 ratio simulations depicted in Figure 1a re-  
89 veal a potential double-peak phenomenon, which diverges from the actual single-peak pattern  
90 observed in reality. This discrepancy underscores the limitations of certain resolutions in accu-  
91 rately capturing the pandemic's dynamics. Additionally, for the metrics related to exposed and  
92 infectious categories, our model was able to generate outcomes in the absence of real-world com-  
93 parative data.

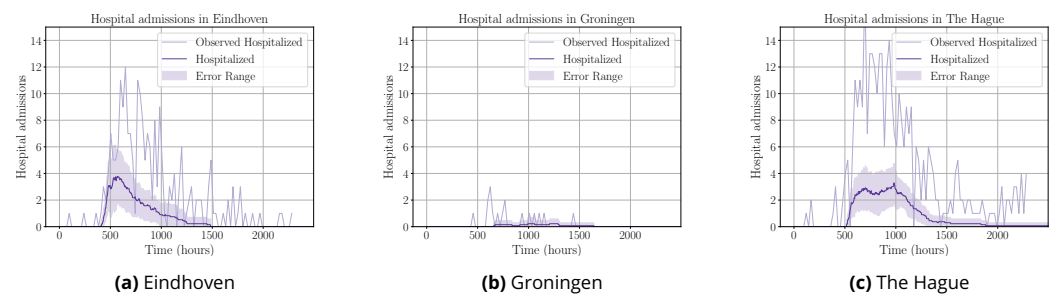

**Figure 2.** Local hospital admissions in the municipalities of (a) Eindhoven, (b) Groningen, and (c) The Hague with the use of synthetic population data during calibration and simulation.

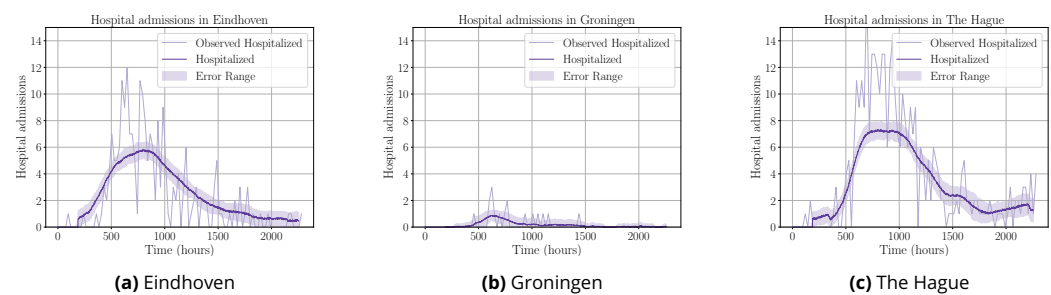

**Figure 3.** Local hospital admissions in the municipalities of (a) Eindhoven, (b) Groningen, and (c) The Hague with the use of CBS microdata population data during calibration and simulation

## 94 Local hospital admission accuracy

95 Another key finding of our study is exposing the influence of microdata on the accuracy of hospi-  
96 tal admissions on a local (municipality) level during the initial wave of COVID-19 for a selected set  
97 of municipalities in the Netherlands: Eindhoven, Groningen, and The Hague. Figure 2 displays the  
98 outcomes derived from calibrating and simulating our model with synthetic population data, while

99 Figure 3 displays the outcomes using individual-level registry data. This comparison is designed to  
100 show the effects of using detailed individual data on a local scale. We observe a notable difference  
101 in the accuracy of the results; the use of microdata yields outcomes that align more closely with  
102 the actual hospital admissions compared to the simulations based on synthetic data. To quantify  
103 the accuracy improvement, we calculate the percentage difference in the root mean squared error  
104 between the observed data and the mean simulated data for each municipality. We find that  
105 applying microdata improves model accuracy by 36.2% for Eindhoven, 22.9% for Groningen, and  
106 48.0% for The Hague, resulting in a mean accuracy improvement of 35.7%. Additionally, the vari-  
107 ability of the results, as indicated by the error range, is significantly reduced when microdata is  
108 utilized. These findings highlight the potential benefits of incorporating detailed individual-level  
109 data in agent-based modeling studies.

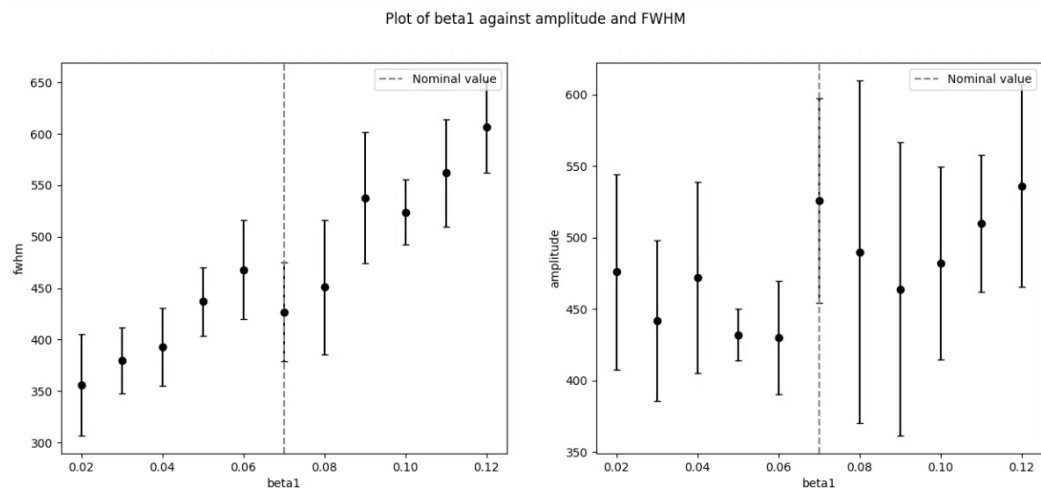

**Figure 4.** Parameter sensitivity analysis using the one-factor-at-a-time (OFAT) method for the  $\beta_1$  parameter.

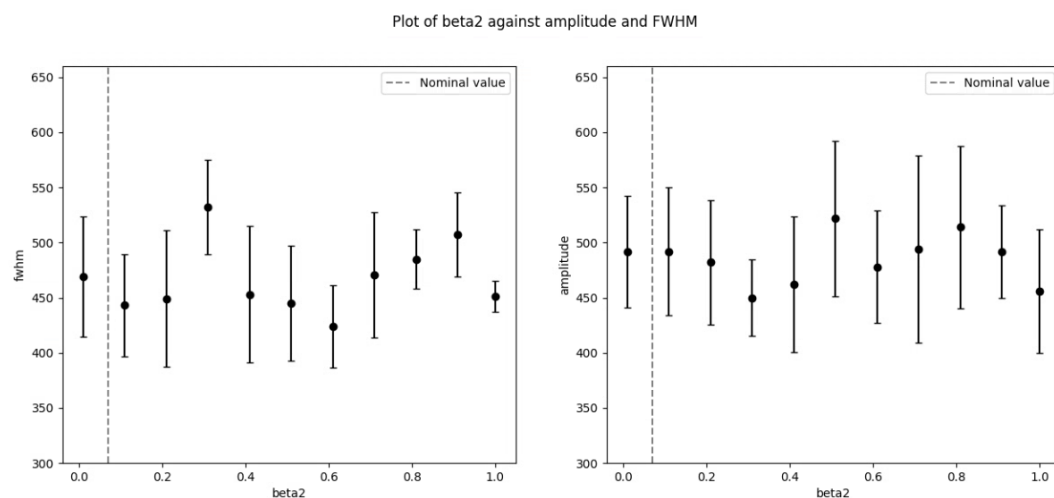

**Figure 5.** Parameter sensitivity analysis using the one-factor-at-a-time (OFAT) method for the  $\beta_2$  parameter.

|                |               |
|----------------|---------------|
| Num. nodes     | 8             |
| Cores per node | 192           |
| CPU            | AMD EPYC 9654 |
| RAM per node   | 384GB         |

**Table 1.** System specifications for simulations. Details the computing resources used in our simulation runs. The nodes are part of Snellius, the Dutch national supercomputer cluster.

---

## 110 Parameter sensitivity analysis

111 The outcomes of the parameter sensitivity analysis are detailed in Figure 4, where we subtly adjust  
112 two of the four variable parameters ( $\beta_{a1}$  and  $\beta_{a2}$ ) in our model to assess their impact on the  
113 stability of our results. Specifically, we examine fluctuations in two key aspects: 1) the full-width  
114 at half maximum (FWHM) and 2) the amplitude of the wave-like pattern, as depicted in Figure 1.  
115 Our analysis reveals that the results evolve gradually as the parameters change, indicating a sta-  
116 ble and proportionate influence on the outcomes. This stability suggests that the parameters are  
117 well-defined and do not exert undue influence on the model's predictions, thereby bolstering our  
118 confidence in the parameters' validity and their role within the model. The effects of the other  
119 two free parameters  $\beta_{a3}$  and  $\beta_{a4}$  that were not added in this section can be found in the ap-  
120 pendix. These two beta values represent the phase-bound behaviors such as wearing face masks  
121 and social distancing in the third and fourth phases of the first COVID-19 wave in the Netherlands.

## 122 Computational performance

123 We wish to highlight the computational performance of our simulations, an aspect often over-  
124 looked or briefly touched upon in discussions of agent-based models. Our decision to focus on  
125 computational efficiency stems from the pivotal role the BioDynaMo framework played in enabling  
126 our research. The advanced computational capabilities of BioDynaMo *Breitwieser et al. (2023)*;  
127 *Hesam et al. (2021)* significantly contributed to the feasibility of our study, allowing us to undertake  
128 complex simulations that would otherwise have been unattainable. The details on the hardware  
129 that was used for the performance benchmarks results can be found in Table 1. The results of the  
130 performance benchmarks can be found in Figure 6.

131 The total duration of a simulation can be divided into initialization time and simulation time.  
132 During initialization, we create agent objects, assign attributes and behaviors to the agents, and  
133 apply configuration parameters. During the simulation, we iterate over all timesteps and all agents  
134 in each timestep. Initialization time can be significant, as agent attributes need to be read from a  
135 file and are therefore limited by disk reading speed.

136 The work of *Dekker et al. (2023)* reported a runtime of 20 hours for a single full simulation  
137 run on a single node where one agent represents one person. Our work demonstrates that the  
138 same model can be simulated in less than 5 minutes on a single node, achieving a speedup of  
139 240 $\times$ . Although we do not know the specific hardware used in their benchmarks, they claimed  
140 that computation time was the bottleneck for simulating their model at such a high resolution.  
141 BioDynaMo's ability to utilize modern hardware capabilities eliminates this issue.

## 142 Discussion

### 143 Hospital admission resolution effect

144 The observation of a decrease in the width of the error bands surrounding the simulated hospital  
145 admissions in Figure 1 confirms our initial hypothesis, in which we stated that a lower agent-to-  
146 person ratio would more accurately track the consequences of the social phenomena at hand.  
147 We can attribute this observation to two aspects of our model. The first aspect is that a single  
148 agent-to-agent infection increments the infection by 1 person rather than 10 or 100, which allows  
149 for more granular stochastic behavior to occur at each simulation step. Especially in regionally-

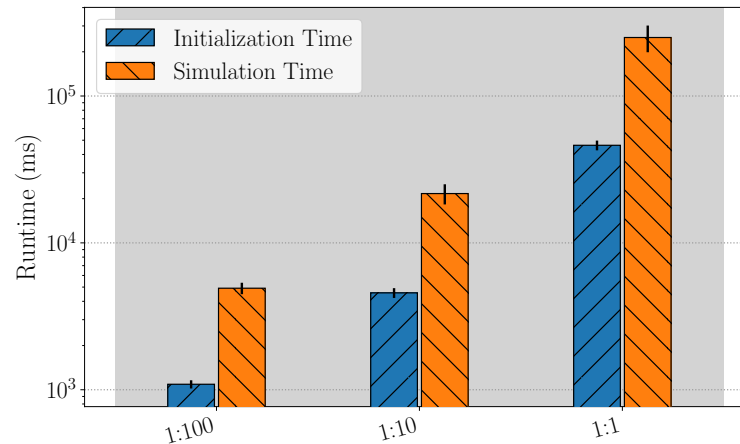

**Figure 6.** Runtime of a single full simulation run of the COVID-19 agent-based model in BioDynaMo for various resolutions indicated by the x-axis label. For these benchmarks, we used only a single node of the system specified in Table 1.

150 resolved simulations such as these, where an epidemic invades previously unaffected regions this  
151 high resolution is important. The second aspect is that individual agent properties that affect the  
152 interaction of agents during the infection behavior (Algorithm 3) are applied to each individual  
153 agent, rather than assigning a random draw from microdata to a group of agents. This follows the  
154 real-life scenario more closely which means that relative risk assessments for various demographic  
155 subpopulations become far more precise and accurate. As described in the section Calibration  
156 the use of higher agent-to-person ratios can be useful when performing a calibration of the free  
157 parameters in an ABM, as the computational runtime of the calibration is reduced significantly.  
158 Once a calibrated set of free parameters are found the search space for a full-scale ABM calibration  
159 is drastically reduced or can even be skipped.

### 160 Effect of microdata on local hospital admission results

161 As part of increasing the resolution at which we perform the agent-based simulations, we also in-  
162 vestigated the effect of microdata for an individual-level agent-based model on a subnational scale.  
163 A similar study has been done in Dekker et al. (2023), but with two distinct differences: 1) the simu-  
164 lations were performed on a 1:100 agent-to-person ratio, and 2) there were no benchmarks results  
165 to evaluate the difference in results when using microdata versus random (synthetic) population  
166 data. One of the clear conclusions that can be drawn from the differences in Figure 3 and Figure 2 is  
167 the improved accuracy in following the observed municipality-level hospital admission data when  
168 applying CBS microdata. Although the results in Figure 2 indicate that there is a wave-like pat-  
169 tern, such as the observed data shows, the absolute number of admissions is not in line with the  
170 observed data. The case of Groningen indeed shows a relatively low admission compared to the  
171 other two municipalities due to the fact that Groningen is geographically situated relatively further  
172 from the epicenter of the pandemic. Applying microlevel data on an individual level allows for the  
173 interactions that take place at each municipality to follow more closely the expected interactions  
174 that had taken place during the time of the pandemic. A clear difference between Figure 3 and  
175 Figure 2 is seen in the size of the error bands, which indicate how accurate the model outcomes  
176 are. In Figure 2, the error bands are much wider than in Figure 3. The error bands visualize the  
177 standard deviation of the multiple simulations of the model with the same input parameters. The  
178 difference can mainly be attributed to the fact that the synthetic population is created anew for  
179 each run of the simulation, using a different random seed each time. This means that the inter-

180 actions within each municipality vary more from one simulation to the next, leading to a broader  
181 spread in the results across different runs.

### 182 **Parameter sensitivity analysis**

183 Utilizing the one-factor-at-a-time (OFAT) method for sensitivity analysis reveals that the agent-  
184 based model's free parameters exhibit low sensitivity to minor adjustments in their values. We  
185 deliberately varied the input parameters subtly to observe their effects on the model outcomes,  
186 rather than to explore the relationship between the parameters and the outcomes. In the context  
187 of the epidemiological use case applied throughout this study, the four free parameters represent  
188 the four phases of interventions during the COVID-19 pandemic in the Netherlands. Each phase  
189 corresponds to a specific set of restrictions imposed on the Dutch population during the initial  
190 wave of the COVID-19 pandemic. As shown in *Results* the two parameters representing the first  
191 two phases turned out to have the most influence on the model's outcome. The first two phases  
192 can be seen as the most critical and impactful phases as they correspond to the initial outbreak  
193 and the rapid escalation of infection rates. These early stages required swift and stringent inter-  
194 ventions to curb the virus's spread and prevent overwhelming the healthcare system.

### 195 **General applicability**

196 The work presented in this paper focuses on the recent COVID-19 pandemic, utilizing and refining  
197 the model from *Dekker et al. (2023)*. We demonstrated that by applying microdata at an individual  
198 level resolution, our model could achieve a finer accuracy in outcomes than the granularity of the  
199 data used for its calibration. The applicability of this finding to other models in different fields  
200 hinges on several factors. Firstly, the efficacy of the agent-based model is critically linked to the  
201 precision of the agent attribute data. In our analysis, the significant factor was the dependency of  
202 agent interactions on the demographic characteristics of each municipality. We anticipate that, in  
203 fields like urban studies, agent-based models would similarly benefit from microdata, which allows  
204 for a more accurate representation of urban populations and their dynamics, such as migration  
205 patterns and clustering phenomena. Secondly, it is essential that agents within the model can  
206 be mapped on a one-to-one basis with their real-world counterparts. This fidelity ensures that  
207 each model agent represents an individual entity in the real world, and enables the application of  
208 microdata to enhance the model. To solidify the general applicability of our findings, a follow-up  
209 study is required.

### 210 **Methods and Materials**

211 In this section, we describe the use case model and how we calibrated the free parameters on  
212 the available data from Dutch health institutes. We perform a parameter sensitivity analysis on  
213 the found parameter set values. Furthermore, we describe the computational approach used to  
214 simulate the large-scale models.

### 215 **Datasets**

216 The datasets used in this work are described in the Table 2.

#### 217 **Synthetic population data**

218 In our study, as an alternative to the CBS microdata we generate synthetic population data for two  
219 primary purposes: firstly, to prototype the model, and secondly, to serve as a baseline for evaluat-  
220 ing the impact of microdata integration. The confidential nature of the CBS microdata necessitates  
221 conducting all related processing within a secure computing environment, as detailed in *Secure Su-  
222 percomputing Infrastructure*. To facilitate the functional development of the agent-based model  
223 outside this restricted setting, we need to work with the synthetic population data. This approach

<sup>1</sup>Non-public microdata from Statistics Netherlands. Under certain conditions, these microdata are accessible for statistical and scientific research. For further information: [microdata@cbs.nl](mailto:microdata@cbs.nl).

| Name            | Description                                                                                                                 | Reference                                               |
|-----------------|-----------------------------------------------------------------------------------------------------------------------------|---------------------------------------------------------|
| POLYMOD         | Age-stratified mixing matrices used to infer contact matrices per municipality and demographic group                        | <i>Prem et al. (2017)</i>                               |
| PIENTER         | Quantifies the impact of physical distancing measures against COVID-19 on contacts and mixing patterns in the Netherlands.  | <i>Backer et al. (2021)</i>                             |
| Google Mobility | Quantifies the impact of COVID-19 restrictions on the mobility of Dutch citizens                                            | <i>Google (2020)</i>                                    |
| CBS Microdata   | National Dutch register data of 2020 containing the attributes sex, age, work status, education, and residence municipality | Statistics Netherlands <sup>1</sup>                     |
| NICE            | Hospital admission data per municipality per day in the Netherlands                                                         | <i>Nationale Intensive Care Evaluatie (NICE) (2020)</i> |

**Table 2.** Overview of datasets used in this study. Throughout this article, we refer to a dataset by the name in this table.

224 proved particularly advantageous for exploratory, trial-and-error methodology, enabling us to ef-  
 225 ficiently identify the necessary tools and software packages for constructing the final model. We  
 226 use the same synthetic population data to perform the comparative study between synthetic data  
 227 and CBS microdata and their contrasting effects on the model outcomes.

228 The pseudocode on how we generate the synthetic population can be found in Algorithm 1. In  
 229 short, we determine the number of individuals per demographic group from the publicly known  
 230 statistics from Statline *Centraal Bureau voor de Statistiek (2023)*, a public tool from Statistics  
 231 Netherlands (CBS). For each individual of the group we assign random values for the sex, age,  
 232 and home location (i.e. municipality).

---

**Algorithm 1** Create synthetic population data

---

```

1: for  $group = 0$  to  $TotalGroups - 1$  do
2:    $percentage \leftarrow PercentageForGroup(group)$ 
3:    $individualsNeeded \leftarrow TotalPopulationSize \times percentage$ 
4:   for  $i = 0$  to  $individualsNeeded - 1$  do
5:      $age \leftarrow RandomBetween(MinAge[group], MaxAge[group])$ 
6:      $sex \leftarrow RandomChoice([Male, Female])$ 
7:      $location \leftarrow RandomBetween(0, NumberOfMunicipalities - 1)$ 
8:      $AddIndividualToPopulation(group, sex, age, location)$ 
9:   end for
10: end for
    
```

---

233 **COVID-19 epidemiological model**

234 In order to study the effects of applying microdata on individual-level agent-based modeling, we  
 235 use the recent epidemiological case of the COVID-19 spread. We use this case as it is a well-studied  
 236 recent case for which the agent behaviors are well-defined and scale out to a country-wide popu-  
 237 lation.

238 The ABM that models the spread of COVID-19 taking into account non-pharmaceutical interven-  
 239 tions is based on the work of *Dekker et al. (2023)*. It models the first wave in 2020 in four distinct  
 240 phases in which the interventions were put in place. Each phase change introduces changes in  
 241 the mobility and interactions that take place between agents. The two main behaviors that are  
 242 followed by each agent are 1) the traveling behavior (see Algorithm 2) and 2) the infection behav-



ior (see Algorithm 3). The traveling behavior updates the location of an agent at each timestep, where the location is one of the 380 municipalities in the Netherlands (in 2020). For each agent, an hourly travel schedule is generated. The hourly travel schedules are based on a gravity model *Ramos (2016)*, which differs from the implementation in *Dekker et al. (2023)*. There are two types of traveling behavior, frequent (traveling during weekdays) and incidental (traveling in the weekend). The exact gravity model used to generate a mobility matrix for frequent and incidental travelers is shown in the following set of equations

$$\begin{aligned} M_{i,j}^{freq} &= \frac{1}{2} \cdot \frac{P_i \cdot P_j}{d_{ij}} \\ M_{i,j}^{inc} &= \frac{1}{7} \cdot \frac{P_i \cdot P_j}{\sqrt{d_{ij}}}, \end{aligned} \quad (1)$$

where  $d_{ij}$  is the Euclidean distance between municipality  $i$  and  $j$ , which respectively have a population of  $P_i$  and  $P_j$ . The mobility matrix for incidental travelers is adjusted by a factor of  $\frac{2}{7}$  and therefore  $M_{i,j}^{inc} = \frac{2}{7} \cdot M_{i,j}^{freq}$ . This adjustment reflects the weekends, accounting for two out of the seven days of the week when most people in the Netherlands travel to destinations other than their typical routes (e.g. going out to another city, visiting family or friends, etc.). This differentiation ensures the matrix accurately represents the travel patterns of frequent versus incidental travelers. A weekly schedule is generated per agent on an hourly basis using a Dirichlet distribution which parameters are based on the mixing matrices as explained in *Dekker et al. (2023)*.

The infection behavior follows from a compartmental SEIR model that includes an additional state of 'hospitalization' to keep track of agents that are admitted to a hospital as a consequence of a COVID-19 infection. In Algorithm 3,  $\lambda$  stands for the force of infection, and  $\beta$  is a phase-bound parameter that represents behaviors such as wearing a face mask and social distancing that cannot easily be modeled in an agent-based model. Upon the start of each consecutive phase in the first COVID-19 wave, the interventions that are put into place affect the mobility of the agents, their demographic mixing behavior, and school closure. For more model details, we refer the reader to *Dekker et al. (2023)*.

We initialize the agent with data from Statistics Netherlands (CBS) to be able to mimic demographic mixing as realistically as possible. As an element in its normal operations as the Dutch National Statistical Institute, CBS continuously and automatically updates its databases. Demographic datasets are typically updated with a monthly cadence but other types of data can be collected depending on the specific data collection. From the 'basis-registratie personen' (BRP), the base register data on this Dutch population, we use the variables sex, age, work status, education, and residence to categorize agents into demographic groups according to *Dekker et al. (2023)*. The social interaction between agents in this model is determined by a mixing matrix that is based on the survey study of *Prem et al. (2017)*.

Another aspect in which our model differs from the model presented in *Dekker et al. (2023)* is the increased resolution of which an agent represents an aggregate number of citizens. In contrast to just modeling a 1:100 agent-to-person ratio, we explore a range of ratios up to 1:1 in order to understand the benefits of high-resolution agent-based modeling on the model outcomes, with a special focus on the accuracy of these outcomes.

A list of all relevant model parameters and their values can be found in Appendix 1.

## 281 Calibration

282 In order to allow for the calibration of large agent-based models in BioDynaMo, we developed a  
283 new method that can be used for distributing multiple simulations as separate processes using  
284 MPI (Message Passing Interface), the Multi-Simulation Manager. Any iterative algorithm that can  
285 run its iterations independently of each other can be used within the simulation manager, but for  
286 the scope of this study we focus on the Particle Swarm Optimization (PSO) algorithm *Kennedy and*  
287 *Eberhart (1995)*. The choice for the PSO algorithm was motivated by the fact that our objective  
288 function is non-convex and non-differentiable.

---

**Algorithm 2** Traveling behavior

---

```

1: procedure Travel(agent, hour_of_week)
2:   if agent.IsHomestay() then
3:     agent.location ← agent.home_location
4:   else
5:     schedule ← agent.weekly_travel_schedule
6:     next_location ← schedule[hour_of_week]
7:     agent.location ← next_location
8:   end if
9: end procedure

```

---

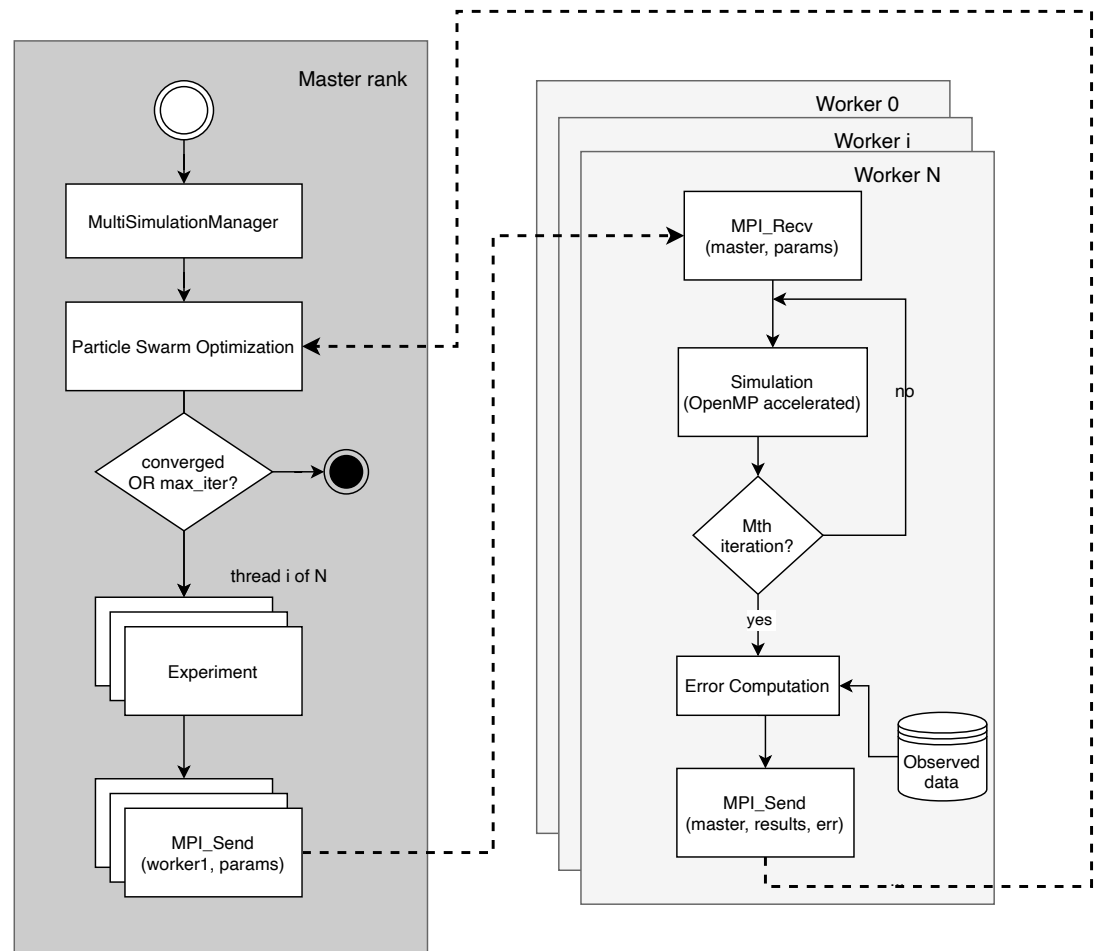

**Figure 7.** Flowchart of the Multi-Simulation Manager using the Particle Swarm Optimization algorithm for calibrating against observed data

---

**Algorithm 3** Infection behavior

---

```
1: procedure Infect(agent, susceptibility,  $\beta$ )
2:    $g \leftarrow$  agent.demography
3:   if agent.state == Susceptible then
4:      $s \leftarrow$  agent.daily_cycle_parameter
5:     mix_sum  $\leftarrow$  DemographicMixing(agent)
6:      $\lambda \leftarrow$  susceptibility[ $g$ ] *  $\beta$  *  $s$  * mix_sum
7:     if  $\mathcal{U}(0, 1) \leq \lambda$  then
8:       agent.state  $\leftarrow$  Exposed
9:     end if
10:  else if agent.state == Exposed then
11:    if incubation_time > incubation_threshold then
12:      agent.state  $\leftarrow$  Infectious
13:    else
14:      incubation_time  $\leftarrow$  incubation_time + 1
15:    end if
16:  else if agent.state == Infectious then
17:    if infection_time > infection_threshold then
18:      agent.state  $\leftarrow$  Recovered
19:    else
20:      infection_time  $\leftarrow$  infection_time + 1
21:      hospital_time  $\leftarrow$  hospital_time + 1
22:      if hospital_time > hospital_threshold then
23:        agent.hospitalized_  $\leftarrow$  true
24:      end if
25:    end if
26:  else if agent.state == Recovered then
27:    hospital_time  $\leftarrow$  hospital_time + 1
28:    if hospital_time > hospital_threshold then
29:      agent.hospitalized_  $\leftarrow$  true
30:    end if
31:    if agent.hospitalized then
32:      if time_in_hospital > hospital_stay then
33:        agent.hospitalized  $\leftarrow$  false
34:      else
35:        time_in_hospital  $\leftarrow$  time_in_hospital + 1
36:      end if
37:    end if
38:  end if
39: end procedure
```

---

289 In short, PSO is a population-based optimization algorithm used to find the global optimum  
290 solution in a search space. In PSO, a set of particles is initialized randomly within the search space,  
291 and each particle moves in the space to find the global optimum. The movement of each particle  
292 is guided by its own best-known position and the global best position found so far by the entire  
293 swarm. The algorithm continues until the convergence criteria are met or a maximum number of  
294 iterations is reached. PSO is a widely used optimization algorithm due to its simplicity and efficiency.  
295 Note that here the particles are not the agents of the model: in the present context, each particle  
296 represents a separate full-scale simulation with 17.4 million agents (i.e. a resolution of one agent  
297 representing one person).

298 Figure 7 shows an overview of the implementation of the Multi-Simulation Manager. In the  
299 context of parallel computing, MPI facilitates the coordination of multiple processors by assigning  
300 each a unique identifier, known as a *rank*. The implementation of the Multi-Simulation Manager  
301 uses a master-worker paradigm, where one rank (the master rank) oversees the computational  
302 work needed to be executed by the worker ranks. In the figure, the master rank initiates a PSO  
303 algorithm with  $N$  particles and at most  $max\_iter$  iterations. Each particle, within each iteration,  
304 represents a full simulation and is executed by one of the worker ranks in the worker pool, and  
305 is repeated  $M$  times for statistical significance. The simulation is executed in a multi-threaded  
306 fashion with OpenMP with a user-specified number of threads. Each worker rank computes the  
307 mean-squared error (MSE) between the simulated values and the observed (expected) values. After  
308 a full iteration, the master receives the MSE from each worker and updates the particle positions  
309 using the optimization algorithm. The algorithm stops when convergence is reached or  $max\_iter$  is  
310 reached.

311 For this case study, we calibrate our agent-based model based on the initial doubling time  
312 of observed hospital admissions during the first wave of the COVID-19 pandemic in the Nether-  
313 lands. This approach aligns with the methods described in the study by Dekker et al. (2022), which  
314 highlights the common practice in epidemiology of calibrating models to the doubling phase of a  
315 pandemic. Specifically, the doubling time refers to the period during which the number of cases  
316 or hospitalizations doubles, providing a critical measure of the virus's spread rate. In this instance,  
317 the doubling time spanned from March 13th to March 27th, approximately two weeks.

318 The objective of the PSO algorithm, in this case, is minimizing the error of the simulated hospital  
319 admissions and the observed hospital admissions during the doubling period, which accounts for  
320 approximately 15% of the total observed hospital admission dataset. The consequent course of  
321 the hospital admissions after the doubling period is left to be predicted by the model. As such, the  
322 model should be able to predict the peak of the wave (both in time and in amplitude) as well as  
323 the decline after the peak.

## 324 **Parameter Sensitivity Analysis**

325 Understanding the influence of each free parameter on the model's outcome is crucial for assess-  
326 ing the stability of an agent-based model. Parameters that significantly alter the outcome with only  
327 minor adjustments might indicate sensitive dependencies within the model, warranting further in-  
328 vestigation to understand their implications fully. This sensitivity could reflect critical dynamics  
329 within the model but could also suggest areas requiring more robust definition or validation. Con-  
330 versely, if a parameter anticipated to have a strong correlation with the model output exhibits little  
331 variation during sensitivity analysis, this may indicate that the parameter is not adequately con-  
332 strained by the available data. Such findings should prompt a reevaluation of both the parameter  
333 settings and the data used for model calibration.

334 There exist various methods to perform parameter sensitivity analysis on agent-based models  
335 *ten Broeke et al. (2016)*. In order to choose the right method it is important to know what one is  
336 trying to achieve with the results of the analysis. In this work, we wish to quantify the variability of  
337 the four beta parameters as described in *COVID-19 epidemiological model* on the correspondence  
338 of the simulated hospital admission to the observed data. The resulting outcome should give us

339 an indication of the robustness of the chosen model parameters and the relative influence on  
340 the model outcome among them. The authors of *ten Broeke et al. (2016)* recommend starting  
341 such an analysis with a version of the one-at-a-time (OAT) method. Although the OAT method  
342 is meant to uncover the emergent patterns and mechanisms of an ABM, the goal of quantifying  
343 the variability of the four beta parameters tells us about the emergence of the pandemic's peak  
344 hospital admission value and its location in time. These values describe the global emergence of  
345 the COVID pandemic that our case study revolves around.

#### 346 One-at-a-Time Method

347 With the one-at-a-time (OAT) or the one-factor-at-a-time (OFAT) method one varies one model pa-  
348 rameter while the other model parameters stay the same. The variation occurs typically around  
349 a nominal value which is the value that best corresponds to the desired model outcome. The dif-  
350 ference between the OAT and OFAT methods is the range of parameter variability: the range in  
351 OAT is narrow, while the range in OFAT is wide. The authors of *ten Broeke et al. (2016)* state that  
352 the narrow range examination (OAT) can be used to estimate the partial derivatives of the model  
353 outcome with respect to the parameter in question, whereas OFAT aims to show the form of re-  
354 lationship between the outcome and the parameter. The latter is of interest at present because  
355 of the need to explore as much as possible the range of outcomes that can be represented. The  
356 former is also important for future use of these models since that technique can be used to deter-  
357 mine which parameters policymakers or national response teams should try to influence, and in  
358 which direction, for the most effective pandemic control.

#### 359 Secure Supercomputing Infrastructure

360 Processing confidential CBS microdata requires a secure computing environment in order to avoid  
361 data leakage. The ODISSEI Secure Supercomputer (OSSC) by *Scheerman et al. (2021)* provides  
362 such an environment. The OSSC runs on a virtualized partition of the Dutch national supercom-  
363 puter, Snellius, and is connected to the CBS data infrastructure using a dedicated VPN connection.  
364 CBS curates various person-level datasets which are made available in pseudonomized form to  
365 researchers under specific guidelines. The microdata used in this work, as referred to in Table 2,  
366 is one such dataset.

367 In order to allow for our simulations to be reproducible among various computing platforms,  
368 we containerized the simulation code and all its dependencies in an Apptainer (formerly known  
369 as Singularity) container. This allowed us to prototype and run the model in BioDynaMo on other  
370 computing platforms before running full-scale simulations and calibrations on the OSSC. Since  
371 the microdata is only available within the OSSC, we used the synthetic population data for our  
372 prototyping efforts as described in Synthetic population data.

#### 373 Code

374 This work uses the BioDynaMo agent-based simulation software to model and simulate the COVID-  
375 19 model. The model code is available at <https://github.com/Senui/covid-abm-paper>. Compiling  
376 this code requires a custom BioDynaMo build. For reproducibility purposes, we created an App-  
377 tainer (formerly known as Singularity) container (*Hesam (2024)*), which can be used to reproduce  
378 the results in this paper. The instructions to obtain and run the simulations can be found in Ap-  
379 pendix 2.

#### 380 Acknowledgments

381 The authors extend their gratitude to the Netherlands Organisation for Scientific Research (NWO)  
382 for funding the compute resources that facilitated the experiments conducted in this study. We  
383 thank SURF ([www.surf.nl](http://www.surf.nl)) for the support in using the National Supercomputer Snellius. We also  
384 thank the CBS Microdata Services team for their support and guidance in utilizing these resources.

## References

- 385  
386 **Backer JA**, Mollema L, Vos ER, Klinkenberg D, van der Klis FR, de Melker HE, van den Hof S, Wallinga J. Im-  
387 pact of physical distancing measures against COVID-19 on contacts and mixing patterns: repeated cross-  
388 sectional surveys, the Netherlands, 2016–17, April 2020 and June 2020. *Eurosurveillance*. 2021; 26(8). [https://](https://www.eurosurveillance.org/content/10.2807/1560-7917.ES.2021.26.8.2000994)  
389 [www.eurosurveillance.org/content/10.2807/1560-7917.ES.2021.26.8.2000994](https://www.eurosurveillance.org/content/10.2807/1560-7917.ES.2021.26.8.2000994), doi: [https://doi.org/10.2807/1560-](https://doi.org/10.2807/1560-7917.ES.2021.26.8.2000994)  
390 [7917.ES.2021.26.8.2000994](https://doi.org/10.2807/1560-7917.ES.2021.26.8.2000994).
- 391 **Breitwieser L**, Hesam A, de Montigny J, Vavourakis V, Iosif A, Jennings J, Kaiser M, Manca M, Di Meglio A, Al-Ars  
392 Z, Rademakers F, Mutlu O, Bauer R. *BioDynaMo*: a modular platform for high-performance agent-based  
393 simulation. *Bioinformatics*. 2021 09; 38(2):453–460. <https://doi.org/10.1093/bioinformatics/btab649>, doi:  
394 [10.1093/bioinformatics/btab649](https://doi.org/10.1093/bioinformatics/btab649).
- 395 **Breitwieser L**, Hesam A, Rademakers F, Luna JG, Mutlu O. High-Performance and Scalable Agent-Based Simula-  
396 tion with *BioDynaMo*. In: *Proceedings of the 28th ACM SIGPLAN Annual Symposium on Principles and Practice of*  
397 *Parallel Programming PPOPP '23*, New York, NY, USA: Association for Computing Machinery; 2023. p. 174–188.  
398 <https://doi.org/10.1145/3572848.3577480>, doi: [10.1145/3572848.3577480](https://doi.org/10.1145/3572848.3577480).
- 399 **ten Broeke G**, van Voorn G, Ligtenberg A. Which Sensitivity Analysis Method Should I Use for My Agent-Based  
400 Model? *Journal of Artificial Societies and Social Simulation*. 2016; 19(1):5. [http://jasss.soc.surrey.ac.uk/19/1/](http://jasss.soc.surrey.ac.uk/19/1/5.html)  
401 [5.html](http://jasss.soc.surrey.ac.uk/19/1/5.html), doi: [10.18564/jasss.2857](https://doi.org/10.18564/jasss.2857).
- 402 **Centraal Bureau voor de Statistiek**, CBS StatLine; 2023. Accessed: July 2023. <http://statline.cbs.nl/>.
- 403 **Conte R**, Paolucci M. On agent-based modeling and computational social science. *Frontiers in Psychology*.  
404 2014; 5. <https://www.frontiersin.org/journals/psychology/articles/10.3389/fpsyg.2014.00668>, doi: [10.3389/fpsyg.](https://doi.org/10.3389/fpsyg.2014.00668)  
405 [2014.00668](https://doi.org/10.3389/fpsyg.2014.00668).
- 406 **Crooks A**, Castle C, Batty M. Key challenges in agent-based modelling for geo-spatial simulation. *Computers,*  
407 *Environment and Urban Systems*. 2008; 32(6):417–430. [https://www.sciencedirect.com/science/article/pii/](https://www.sciencedirect.com/science/article/pii/S0198971508000628)  
408 [S0198971508000628](https://www.sciencedirect.com/science/article/pii/S0198971508000628), doi: <https://doi.org/10.1016/j.compenvurbsys.2008.09.004>, geoComputation: Modeling  
409 with spatial agents.
- 410 **Dekker MM**, Coffeng LE, Pijpers FP, Panja D, de Vlas SJ. Reducing societal impacts of SARS-CoV-2 interventions  
411 through subnational implementation. *eLife*. 2023 mar; 12:e80819. <https://doi.org/10.7554/eLife.80819>, doi:  
412 [10.7554/eLife.80819](https://doi.org/10.7554/eLife.80819).
- 413 **Edmonds B**, Meyer R, editors. *Simulating Social Complexity - A Handbook*, Second Edition. Springer; 2017.  
414 <https://doi.org/10.1007/978-3-319-66948-9>, doi: [10.1007/978-3-319-66948-9](https://doi.org/10.1007/978-3-319-66948-9).
- 415 **Google**, COVID-19 Community Mobility Reports; 2020. <https://www.google.com/covid19/mobility/>, accessed: 31  
416 October 2021.
- 417 **Hesam A**, Apptainer container for reproducibility of paper "Enhancing Accuracy in Country-Wide Agent-Based  
418 Epidemiological Modeling through the Application of 17 Million Individual-Level Microdata Points". Zenodo;  
419 2024. <https://doi.org/10.5281/zenodo.11225732>, doi: [10.5281/zenodo.11225732](https://doi.org/10.5281/zenodo.11225732).
- 420 **Hesam A**, Breitwieser L, Rademakers F, Al-Ars Z. Gpu acceleration of 3d agent-based biological simulations.  
421 In: *2021 IEEE International Parallel and Distributed Processing Symposium Workshops (IPDPSW)* IEEE; 2021. p.  
422 210–217.
- 423 **Kennedy J**, Eberhart R. Particle swarm optimization. In: *Proceedings of ICNN'95-international conference on*  
424 *neural networks*, vol. 4 IEEE; 1995. p. 1942–1948.
- 425 **van der Laan J**, de Jonge E, Das M, Te Riele S, Emery T. A Whole Population Network and Its Application for the  
426 Social Sciences. *European Sociological Review*. 2022 06; 39(1):145–160. <https://doi.org/10.1093/esr/jcac026>,  
427 doi: [10.1093/esr/jcac026](https://doi.org/10.1093/esr/jcac026).
- 428 **Nationale Intensive Care Evaluatie (NICE)**, COVID-19 Hospital Admissions Dataset. Nationale Intensive Care  
429 Evaluatie (NICE); 2020. Accessed on 08-09-2023. Dataset ID: 19df65e9-3393-4d94-a177-28bb9ac2c8ee. Meta-  
430 data ID: 4f4ad069-8f24-4fe8-b2a7-533ef27a899f. Last modified on 18-03-2021. [http://creativecommons.org/](http://creativecommons.org/publicdomain/mark/1.0/deed.nl)  
431 [publicdomain/mark/1.0/deed.nl](http://creativecommons.org/publicdomain/mark/1.0/deed.nl).
- 432 **Perra N**. Non-pharmaceutical interventions during the COVID-19 pandemic: A review. *Physics*  
433 *Reports*. 2021; 913:1–52. <https://www.sciencedirect.com/science/article/pii/S0370157321000624>, doi:  
434 <https://doi.org/10.1016/j.physrep.2021.02.001>, non-pharmaceutical interventions during the COVID-19 pan-  
435 demic: a review.

- 436 **Prem K**, Cook AR, Jit M. Projecting social contact matrices in 152 countries using contact surveys and demo-  
437 graphic data. PLOS Computational Biology. 2017 09; 13(9):1–21. <https://doi.org/10.1371/journal.pcbi.1005697>,  
438 [doi: 10.1371/journal.pcbi.1005697](https://doi.org/10.1371/journal.pcbi.1005697).
- 439 **Ramos R**. Gravity models: a tool for migration analysis. IZA World of Labor. 2016; [doi: 10.15185/izawol.239](https://doi.org/10.15185/izawol.239).
- 440 **Scheerman M**, Zarrabi N, Kruitte M, Mogé M, Voort L, Langedijk A, Schoonhoven R, Emery T, Secure Platform  
441 for Processing Sensitive Data on Shared HPC Systems; 2021.

442 **Appendix 1**

443 **Model details**

444 **Appendix 1—table 1.** Input Parameters for the COVID-19 model

| Parameter                     | Value     | Description                                        |
|-------------------------------|-----------|----------------------------------------------------|
| repeat                        | 10        | Number of times to repeat the simulation           |
| population_size               | 17181084  | Total population size                              |
| init_infection_rate           | 0.1       | Initial infection rate                             |
| init_infection_time           | 408 hours | Initial infection time                             |
| total_hours                   | 2256      | Total hours from 27 Feb to 1 June 2020             |
| phase_1_hours                 | 336       | Hours between 27 Feb and 12 March                  |
| phase_2_hours                 | 264       | Hours between 12 March and 23 March                |
| phase_3_hours                 | 1176      | Hours between 23 March and 11 May                  |
| phase_4_hours                 | 504       | Hours between 11 May and 1 June                    |
| phase_2_mobility_reduction    | 0.372     | Mobility reduction in phase 2                      |
| phase_3_mobility_reduction    | 0.424     | Mobility reduction in phase 3                      |
| phase_4_mobility_reduction    | 0.201     | Mobility reduction in phase 4                      |
| beta1                         | 0.0701    | Transmission rate parameter for phase 1            |
| beta2                         | 0.0093    | Transmission rate parameter for phase 2            |
| beta3                         | 0.3533    | Transmission rate parameter for phase 3            |
| beta4                         | 0.2380    | Transmission rate parameter for phase 4            |
| phase_2_homeschooling_parents | 12%       | Percentage of parents homeschooling in phase 2     |
| no_fixed_seed                 | false     | Whether a fixed seed is used for simulation        |
| incubation_shape_param        | 20        | Shape parameter for the incubation period          |
| incubation_scale_param        | 110.4     | Scale parameter for the incubation period (hours)  |
| infection_shape_param         | 1         | Shape parameter for the infection period           |
| infection_scale_param         | 120       | Scale parameter for the infection period (hours)   |
| hospitalization_shape_param   | 14        | Shape parameter for hospitalization period         |
| hospitalization_scale_param   | 240       | Scale parameter for hospitalization period (hours) |
| hospital_average_mean         | 2.48      | Mean of hospital stay (days)                       |
| hospital_average_sigma        | 0.913     | Standard deviation of hospital stay                |
| homestay_mean                 | 15        | Mean duration of staying at home (days)            |
| homestay_sigma                | 6         | Standard deviation of staying at home duration     |



## 445 Appendix 2

### 446 Reproducing results

447 This paragraph describes the steps needed to reproduce the results of this work. Some  
448 of the results require access to sensitive datasets provided by Statistics Netherlands as referred to in Table 2, which can only be accessed in a secure remote environment. See the  
449 corresponding footnote in Table 2 for more information.

451 For the purpose of reproducibility, we have created an Apptainer container *Hesam (2024)*  
452 that can be downloaded and used to build and run the simulation code in, which is available  
453 at <https://github.com/Senui/covid-abm-paper>. Apptainer is an open-source software tool  
454 that can be installed from <https://apptainer.org>. We recommend a Linux-based system to  
455 perform the simulations on.

456 Once Apptainer is installed in the simulation environment and the Apptainer image is  
457 downloaded, the BioDynaMo source code and the simulation code need to be cloned from  
458 the aforementioned Github repository. The simulation environment can then be set up as  
459 shown in as follows:

```
460 1 export BDM_SOURCE_DIR=' /path/to/biodynamo '  
461 2 export SIM_SOURCE_DIR=' /path/to/abm-covid-paper '  
462 3  
463 4 reproduce/start_container.sh  
464  
465
```

#### 466 Listing 1. Running a single simulation

468 This will deploy a containerized environment that is identical to the environment with  
469 which the results for this paper were produced. It will automatically start a simulation with  
470 the input parameters defined in the `bdm.json`. To run any other set of input parameters you  
471 can adjust the contents of the `bdm.json` file. There are various configuration files present in  
472 the simulation code repository (in the `config` directory), which are named according to the  
473 type of experiments that are run for this paper. The results of a single simulation can be  
474 found in the directory `build/output/single-experiments`

475 To run multiple simulations distributed on a cluster or supercomputer (for calibration  
476 or parameter sensitivity analysis) the following script needs to be invoked:

```
477 1 export BDM_SOURCE_DIR=' /path/to/biodynamo '  
478 2 export SIM_SOURCE_DIR=' /path/to/abm-covid-paper '  
479 3  
480 4 sbatch reproduce/start_container_mpi.batch  
481  
482
```

#### 483 Listing 2. Running many simulations distributed

485 The results of multiple simulation runs can be found in the directory  
486 `build/output/experiments_<timestamp>`.
